# Supplementary material for: Beneficial effect of the short-chain fatty acid propionate on vascular calcification through intestinal microbiota remodelling
Source: PubMed Central journal article supplement (PMC9667615; doi:10.1186/s40168-022-01390-0), 2022-11-16

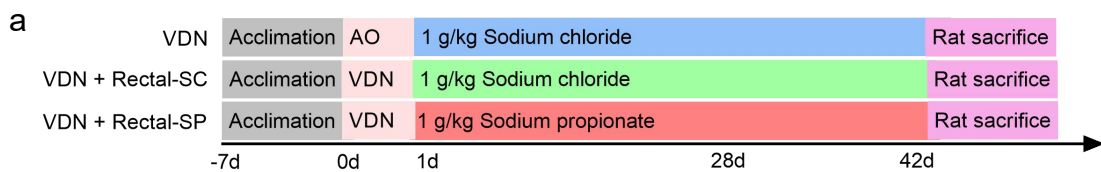

**b**                  VDN                  VDN + Rectal-SC                  VDN + Rectal-SP

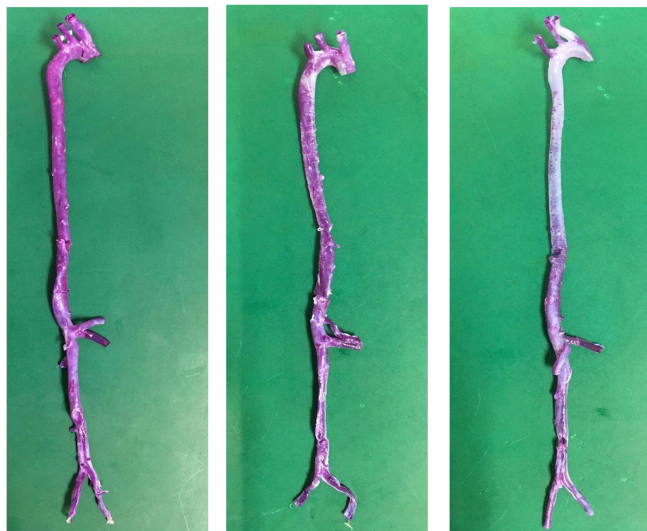

**c**

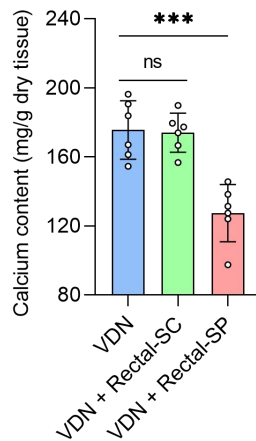

**e**

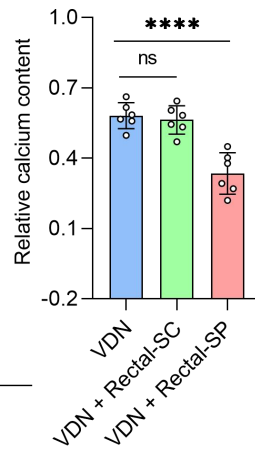

**d**                  VDN                  VDN + Rectal-SC                  VDN + Rectal-SP

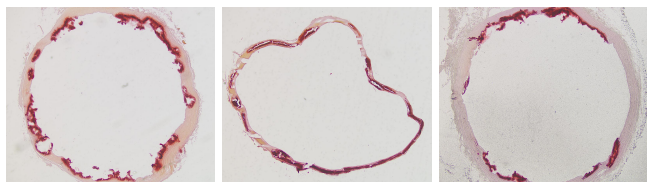

**f**

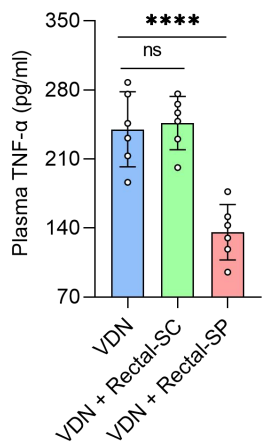

**g**

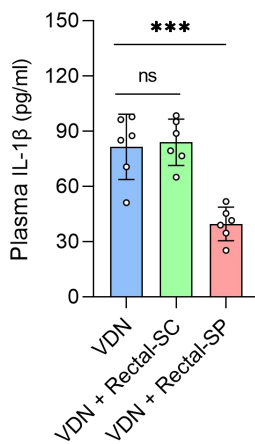

**h**

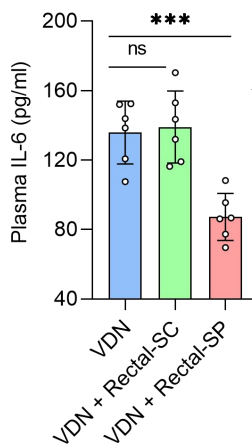

Supplement: 40168_2022_1390_MOESM5_ESM.pdf [file 40168_2022_1390_MOESM5_ESM.pdf]
