# Supplementary material for: Beneficial effect of the short-chain fatty acid propionate on vascular calcification through intestinal microbiota remodelling
Source: PubMed Central journal article supplement (PMC9667615; doi:10.1186/s40168-022-01390-0), 2022-11-16

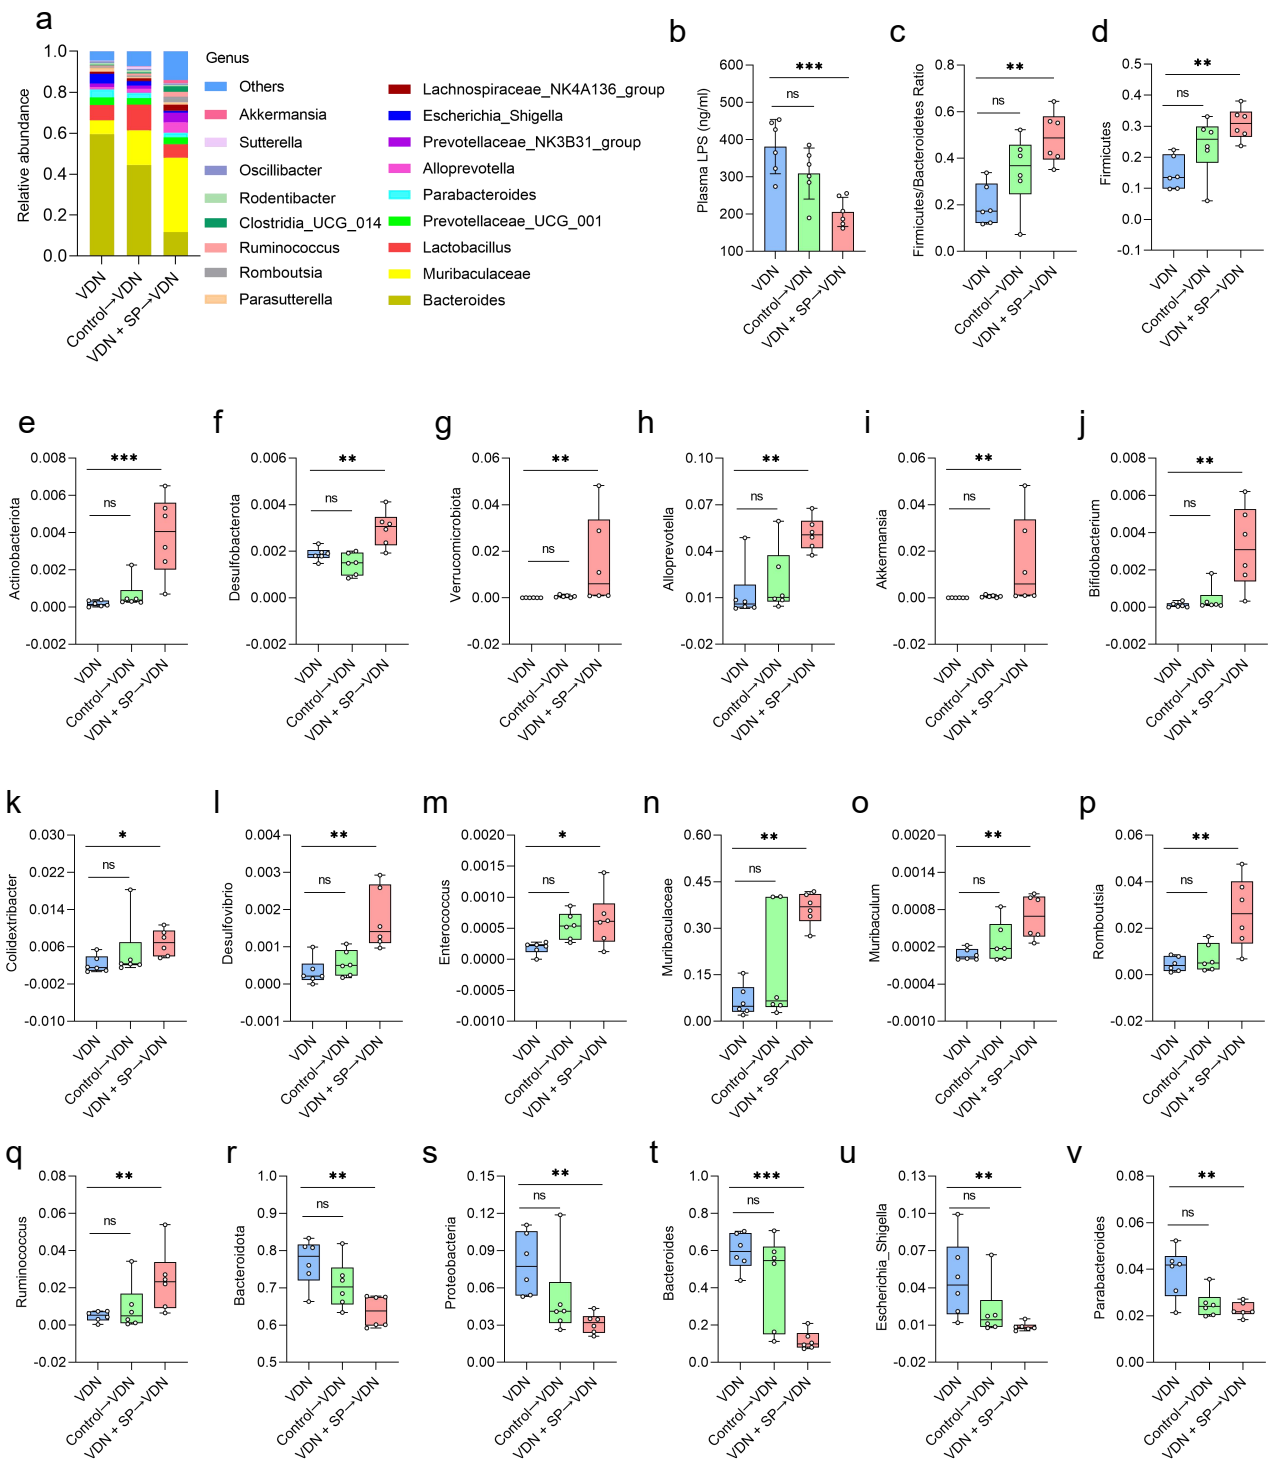

Supplement: 40168_2022_1390_MOESM16_ESM.pdf [file 40168_2022_1390_MOESM16_ESM.pdf]
